# Supplementary material for: The In Silico Sugarcane Genome-Encoded MicroRNA and Target Network Prediction for Targeting the SCMV
Source: Preprints.org preprint supplement (doi:10.20944/preprints202305.1521.v1), 2023-05-22
Supplement: Supplementary file 1 [file supplementary]

## Sheet: Sheet1
miRNA Name	Position (miRanda)	Genes	Position (RNA22)	Genes	Position (TAPIR)	Genes	Position (psRNATarget)	Genes	Position (RNAhybrid)	Genes
sof-miR156							5909	NIa-VPg	9402	3'UTR
sof-miR159a							5911	NIa-VPg	8953	CP
sof-miR159a (1)							3847	CI
sof-miR159b							5911	NIa-VPg	8953	CP
sof-miR159b (1)							3847	CI
sof-miR159c			3847	CI	3847	CI	3847	CI	1830	HC-Pro
sof-miR159c (1)			3730	CI			5911	NIa-VPg
sof-miR159d							5911	NIa-VPg	8953	CP
sof-miR159d (1)							3847	CI
sof-miR159e					1159	HC-Pro	3847	CI	8952	CP
sof-miR167a			9520	3'UTR			2427	P3	2699	P3
sof-miR167b			9520	3'UTR			2427	P3	2699	P3
sof-miR168a	547	P1	846	P1			2971	P3	1296	HC-Pro
sof-miR168a (1)	2562	P3	1296	HC-Pro
sof-miR168a (2)	1827	HC-Pro
sof-miR168b	2562	P3	846	P1	406	P1			1818	HC-Pro
sof-miR168b(1)	1827	HC-Pro
sof-miR168b(2)	547	P1
sof-miR396	3634	CI	6821	NIa			7116	NIb	5016	CI
sof-miR408a	139	5'UTR	5538	6K2					8355	CP
sof-miR408b	139	5'UTR	5538	6K2					8355	CP
sof-miR408c	139	5'UTR	5538	6K2					8355	CP
sof-miR408d	139	5'UTR	5538	6K2					8355	CP
sof-miR408e			5538	6K2			6544	NIa	3633	CI
ssp-miR166	4178	CI							3714	CI
ssp-miR169	7798	NIb							8458	CP
ssp-miR437a					4869	CI			4868	CI
ssp-miR437b									2416	P3
ssp-miR437c							2981	P3	9395	3'UTR
ssp-miR528	6376	NIa			122	5'UTR			121	5'UTR
ssp-miR827									6338	NIa
ssp-miR444a	8501	CP	8502	CP			1058	HC-Pro	1057	HC-Pro
ssp-miR444a(1)			5311				2367	P3
ssp-miR444a(2)							6641	NIa
ssp-miR444b	8501	CP	8502	CP			7142	NIb	1057	HC-Pro
ssp-miR444b(1)			5311	CI			1058	HC-Pro
ssp-miR444b(2)							6641	NIa
ssp-miR444b(3)							2367	P3
ssp-miR444b(4)							3992	CI
ssp-miR444c-3p	8501	CP	5552	NIa-VPg	5583	NIa-VPg	9282	CP	1057	HC-Pro
ssp-miR444c-3p(1)	9268	CP	9181	CP			1763	HC-Pro
ssp-miR444c-3p(2)							2367	P3
ssp-miR444c-3p(3)							5583	NIa-VPg
ssp-miR444c-3p(4)							3441	6K1
ssp-miR1128					4534	CI			4533	CI
ssp-miR1432	7523	NIb	1315		HC-Pro		3980	CI	1316	HC-Pro
Loci	19		20		7		30		28
miRNAs	14		15		7		16		28
5'UTR	4				1				1
P1	2		2		1
HC-Pro	2		1		1		3		7
P3	2						7		3
6K1							1
CI	2		3		3		7		5
6K2			5
NIa-VPg			1		1		6
NIa	1		1				3		1
NIb	2						2
CP	4		3				1		9
3'UTR			2						2
